# Supplementary material for: Investigating Machine Learning Applications for Effective Real-Time Water Quality Parameter Monitoring in Full-Scale Wastewater Treatment Plants
Source: MDPI journal article supplement (doi:10.3390/w14193147), 2022-10-06
Supplement: s1 [file s1]

Archive with 1 entries (1 files):
- water-1898361-supplementary.pdf
