# Supplementary material for: Investigating Machine Learning Applications for Effective Real-Time Water Quality Parameter Monitoring in Full-Scale Wastewater Treatment Plants
Source: MDPI journal article supplement (doi:10.3390/w14193147), 2022-10-06
Supplement: s1 [file s1 › water-1898361-supplementary.pdf]

## Supplementary Information

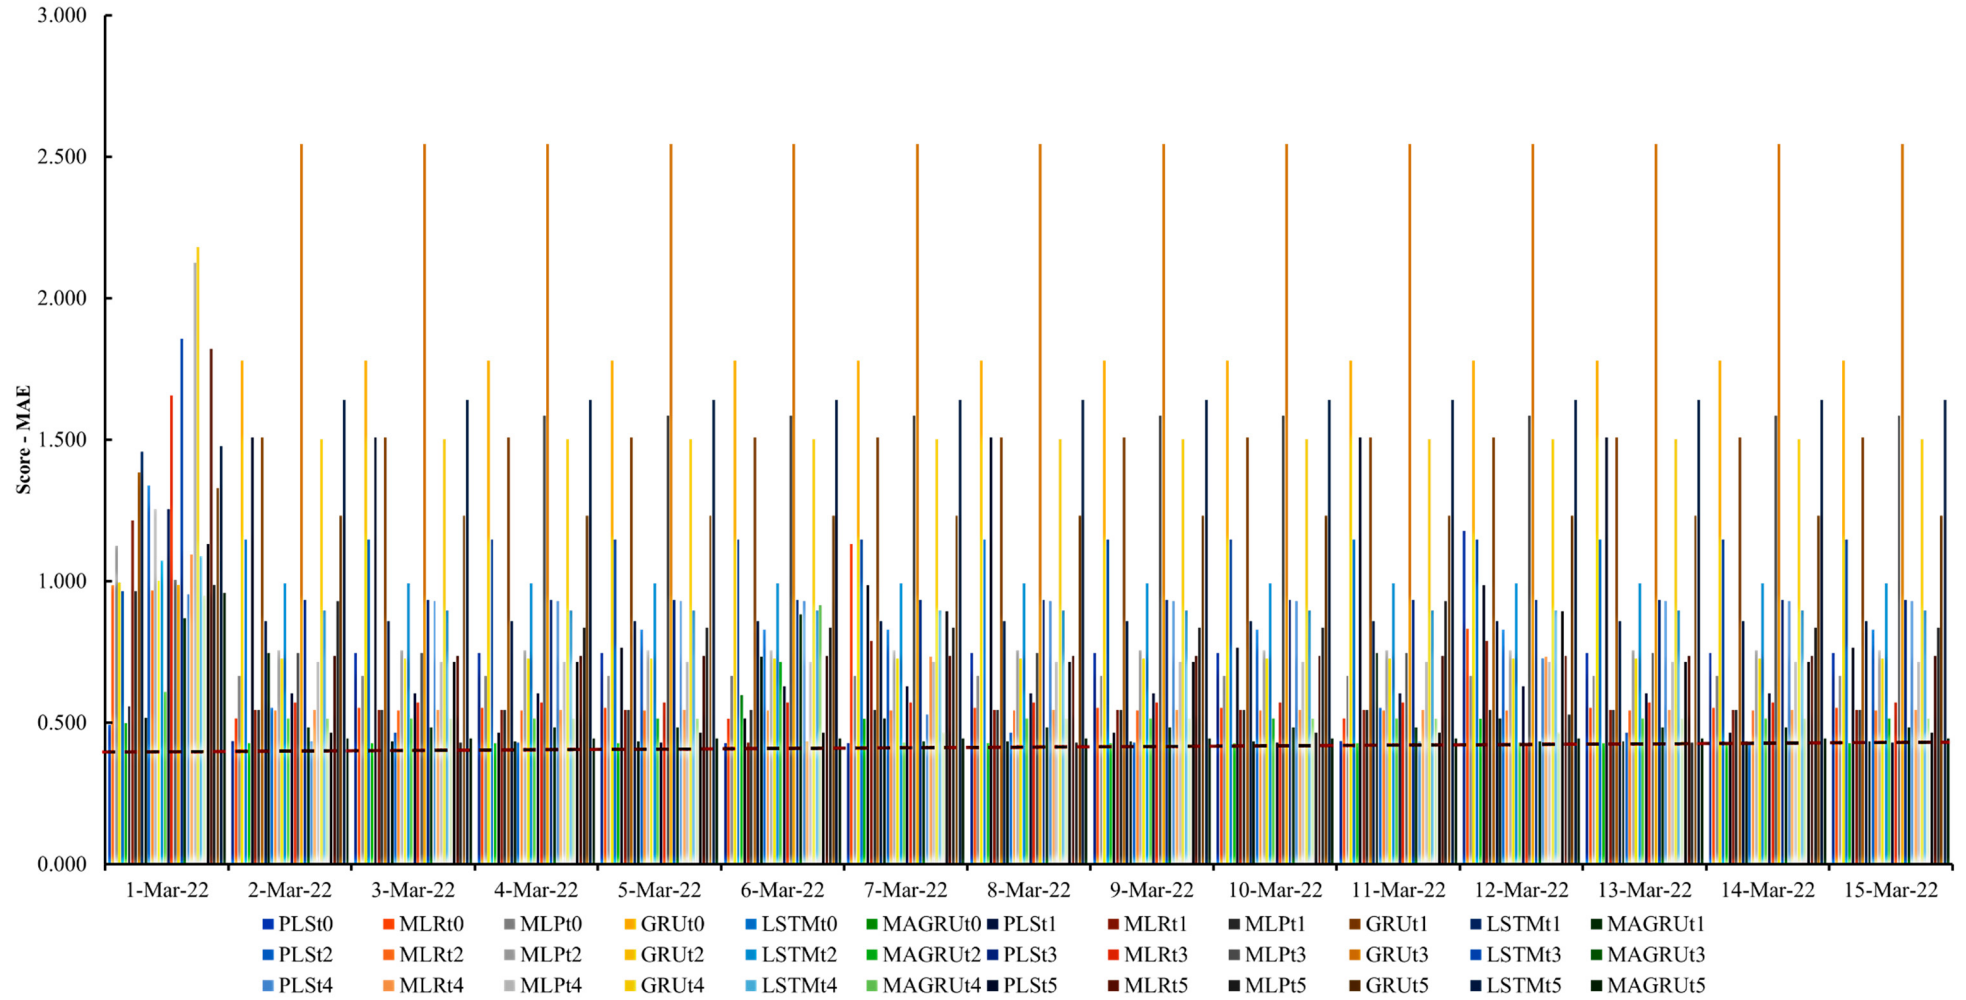

**Figure S1** Results of the selection of different training models in time series.

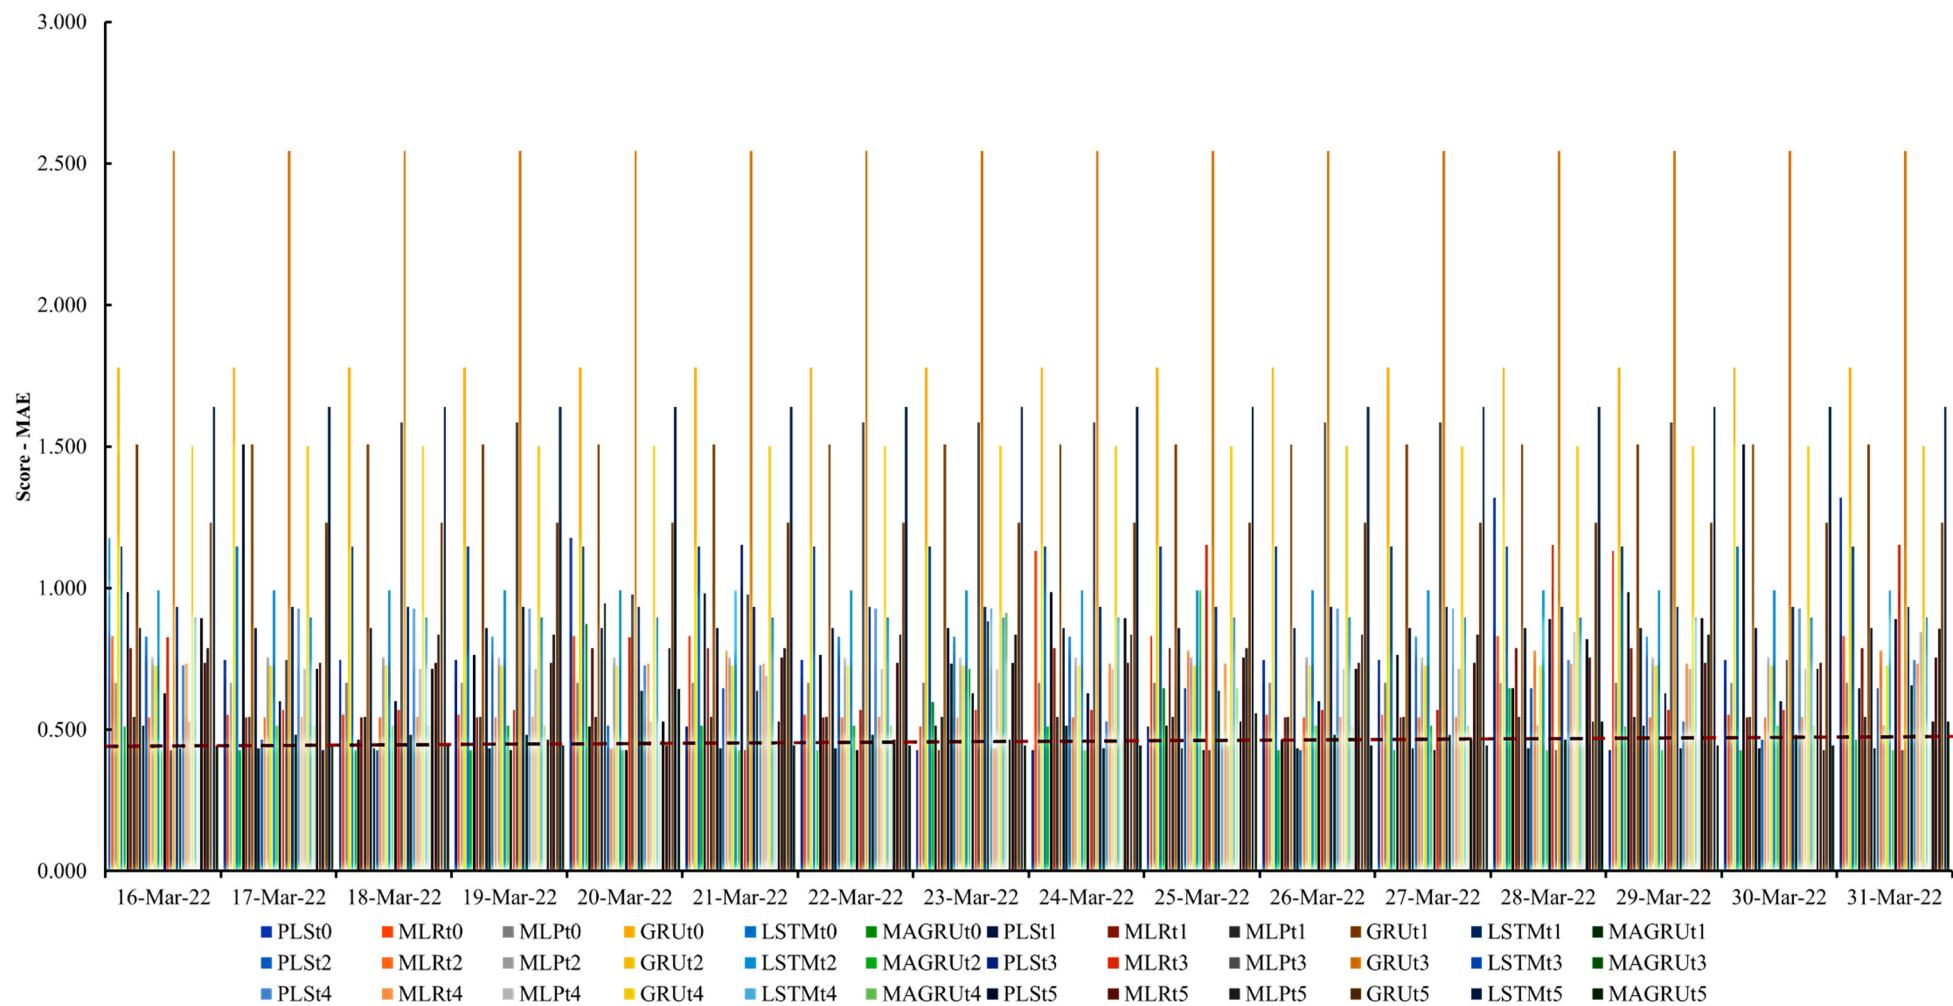

**Figure S2** Results of the selection of different training models in time series.

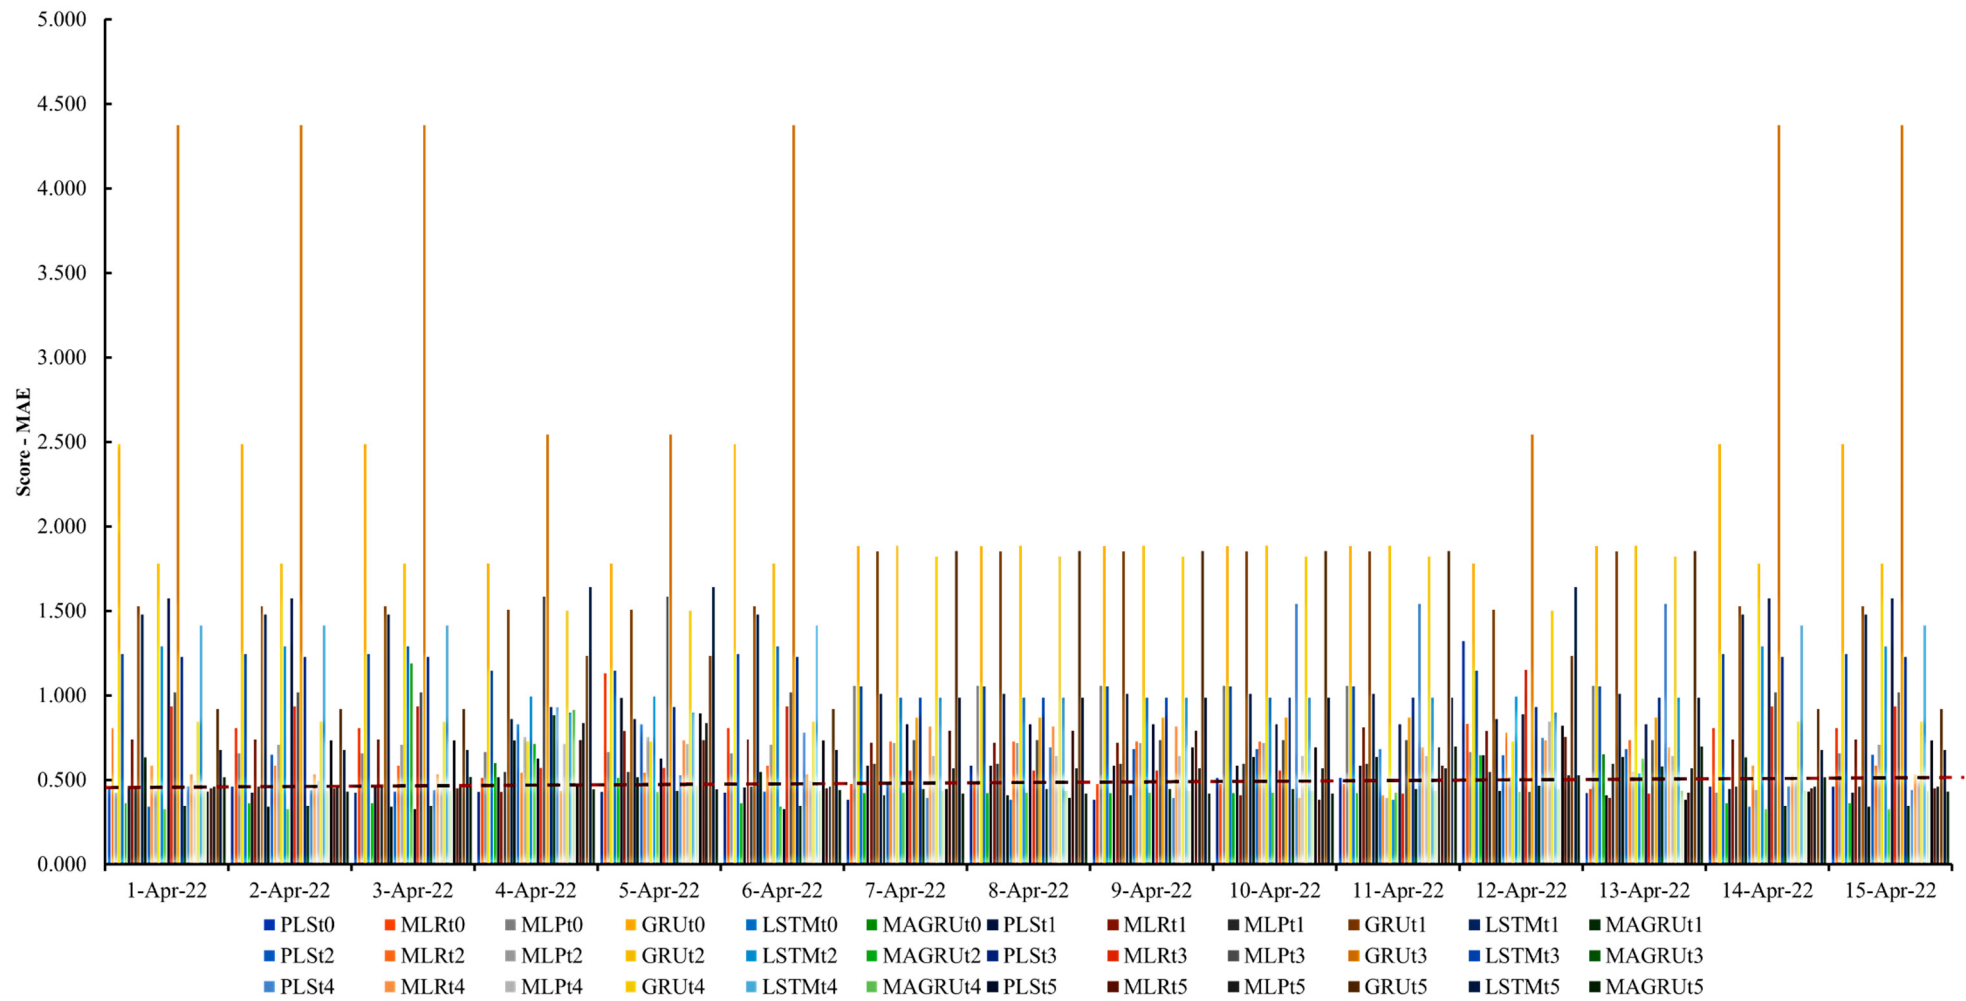

**Figure S3** Results of the selection of different training models in time series.

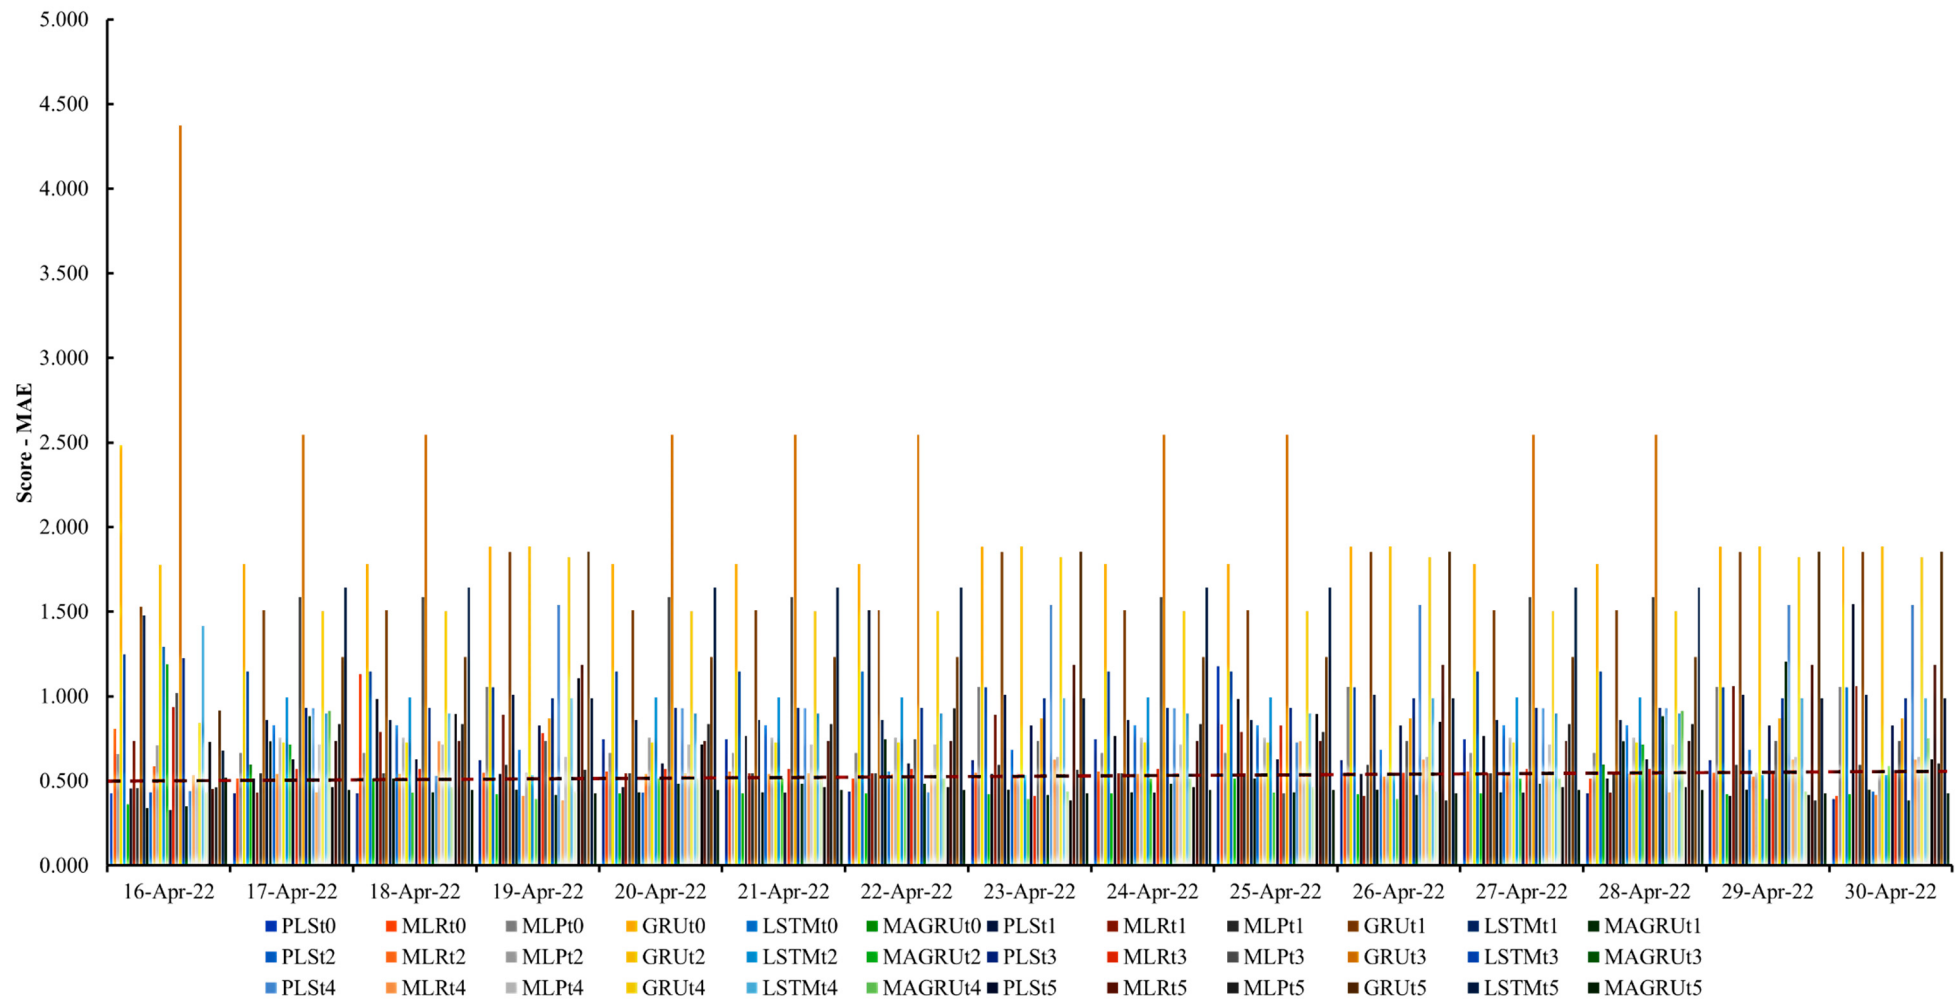

**Figure S4** Results of the selection of different training models in time series.
